# Supplementary material
Source: PubMed Central journal article supplement (PMC3149823)

**SUPPLEMENTAL MATERIAL**

**Table S1: Strain×diet interactions for the number of c-Fos (Table 1) and Zif268 (Table 2) positive cells after (15×CS) extinction retrieval in unconditioned mice fed control (Ctl) or Zn-restricted (ZnR) diets 3 weeks prior to conditioning. n=4/group.**

| <b>Region (distance from Bregma)</b>          | <b>c-Fos<br/>Strain×diet interaction</b> | <b>Zif268<br/>Strain×diet interaction</b> |
|-----------------------------------------------|------------------------------------------|-------------------------------------------|
| <i>Cortical regions</i>                       |                                          |                                           |
| <b>Primary motor (M1, 1.78 mm)</b>            | $F_{(1,12)}=0.09, p=0.77$                | $F_{(1,12)}=0.12, p=0.74$                 |
| <b>Secondary motor (M2, 1.78 mm)</b>          | $F_{(1,12)}=0.05, p=0.83$                | $F_{(1,12)}=0.25, p=0.62$                 |
| <b>Cingulate area 1 (Cg1, 1.78 mm)</b>        | $F_{(1,12)}<0.01, p=1.00$                | $F_{(1,12)}=0.16, p=0.70$                 |
| <b>Cingulate area 1 (Cg1, 1.54 mm)</b>        | $F_{(1,12)}=0.05, p=0.82$                | $F_{(1,12)}=2.53, p=0.14$                 |
| <b>Cingulate area 2 (Cg2, 1.10 mm)</b>        | $F_{(1,12)}=0.04, p=0.85$                | $F_{(1,12)}=0.08, p=0.78$                 |
| <b>Prelimbic (PrL, 1.98 mm)</b>               | $F_{(1,12)}=1.15, p=0.30$                | $F_{(1,12)}=1.13, p=0.31$                 |
| <b>Prelimbic (PrL, 1.78 mm)</b>               | $F_{(1,12)}=0.08, p=0.78$                | $F_{(1,12)}=1.67, p=0.22$                 |
| <b>Prelimbic (PrL, 1.54 mm)</b>               | $F_{(1,12)}=0.03, p=0.87$                | $F_{(1,12)}=0.08, p=0.77$                 |
| <b>Infralimbic (IL, 1.98 mm)</b>              | $F_{(1,12)}=0.41, p=0.53$                | $F_{(1,12)}=0.69, p=0.42$                 |
| <b>Infralimbic (IL, 1.78 mm)</b>              | $F_{(1,12)}=3.16, p=0.11$                | $F_{(1,12)}=0.10, p=0.75$                 |
| <b>Infralimbic (IL, 1.54 mm)</b>              | $F_{(1,12)}=0.25, p=0.62$                | $F_{(1,12)}=0.10, p=0.76$                 |
| <b>Insular cortex (AI, 1.98 mm)</b>           | No detectable expression                 | $F_{(1,12)}=0.32, p=0.58$                 |
| <b>Insular cortex, dorsal (AID, 1.78 mm)</b>  | No detectable expression                 | $F_{(1,12)}=0.02, p=0.90$                 |
| <b>Insular cortex, dorsal (AID, 1.54 mm)</b>  | No detectable expression                 | $F_{(1,12)}=0.18, p=0.68$                 |
| <b>Insular cortex, ventral (AIV, 1.78 mm)</b> | No detectable expression                 | $F_{(1,12)}=0.14, p=0.71$                 |

|                                               |                                             |                                                |
|-----------------------------------------------|---------------------------------------------|------------------------------------------------|
| <b>Insular cortex, ventral (AIV, 1.54 mm)</b> | <b>No detectable expression</b>             | <b><math>F_{(1,12)}=1.00, p=0.34</math></b>    |
| <b>Perirhinal cortex (PRh, -1.58mm)</b>       | <b>No detectable expression</b>             | <b><math>F_{(1,12)}=1.18, p=0.30</math></b>    |
| <b>Ectorhinal cortex (Ect, -1.58mm)</b>       | <b>No detectable expression</b>             | <b><math>F_{(1,12)}=0.03, p=0.88</math></b>    |
| <b><i>Amygdala nuclei (all -1.58 mm)</i></b>  |                                             |                                                |
| <b>Lateral, dorsal (LAd)</b>                  | <b><math>F_{(1,12)}=0.01, p=0.93</math></b> | <b><math>F_{(1,12)}&lt;0.01, p=0.96</math></b> |
| <b>Lateral, ventral (LAv)</b>                 | <b>No detectable expression</b>             | <b><math>F_{(1,12)}=1.40, p=0.26</math></b>    |
| <b>Basolateral, anterior (BA)</b>             | <b><math>F_{(1,12)}=1.05, p=0.32</math></b> | <b><math>F_{(1,12)}=0.78, p=0.39</math></b>    |
| <b>Central, medial (CeM)</b>                  | <b><math>F_{(1,12)}=0.02, p=0.90</math></b> | <b><math>F_{(1,12)}=0.32, p=0.58</math></b>    |
| <b>Central, lateral (CeL)</b>                 | <b><math>F_{(1,12)}=0.02, p=0.87</math></b> | <b><math>F_{(1,12)}=0.22, p=0.64</math></b>    |
| <b>Central, capsular (CeC)</b>                | <b><math>F_{(1,12)}=0.11, p=0.75</math></b> | <b><math>F_{(1,12)}=0.02, p=0.90</math></b>    |
| <b>Medial paracapsular ITC (Imp)</b>          | <b>No detectable expression</b>             | <b><math>F_{(1,12)}=0.78, p=0.40</math></b>    |
| <b>Lateral paracapsular ITC (Ilp)</b>         | <b>No detectable expression</b>             | <b><math>F_{(1,12)}=0.02, p=0.90</math></b>    |
| <b>ITC nucleus (In)</b>                       | <b>No detectable expression</b>             | <b><math>F_{(1,12)}&lt;0.01, p=0.96</math></b> |
| <b>Medial, posterodorsal (MePD)</b>           | <b><math>F_{(1,12)}=0.06, p=0.82</math></b> | <b><math>F_{(1,12)}=0.26, p=0.62</math></b>    |
| <b>Medial, posteroventral (MePV)</b>          | <b><math>F_{(1,12)}=0.96, p=0.35</math></b> | <b><math>F_{(1,12)}=0.53, p=0.48</math></b>    |
| <b>Anterior cortical (ACo)</b>                | <b><math>F_{(1,12)}=0.10, p=0.76</math></b> | <b><math>F_{(1,12)}&lt;0.01, p=0.99</math></b> |
| <b>Posterolateral cortical (PLCo)</b>         | <b><math>F_{(1,12)}=1.46, p=0.25</math></b> | <b><math>F_{(1,12)}=0.11, p=0.75</math></b>    |

Figure S1: Effect of time between fear conditioning and fear extinction training on potential savings in extinction learning. Extinction training performed 14 days, as opposed to 1 day, after fear conditioning resulted in savings in extinction learning in ZnR S1, control-fed B6 (B6 Ctl) and ZnR B6, but not in control-fed S1 (S1 Ctl). Data are presented as Means  $\pm$  SEM. \* $p < 0.05$  S1 Ctl vs. B6 Ctl; # $p < 0.05$  S1 Ctl vs. S1 ZnR; † $p < 0.05$  B6 ZnR vs. S1 Ctl; § $p < 0.05$  B6 Ctl vs B6 ZnR.

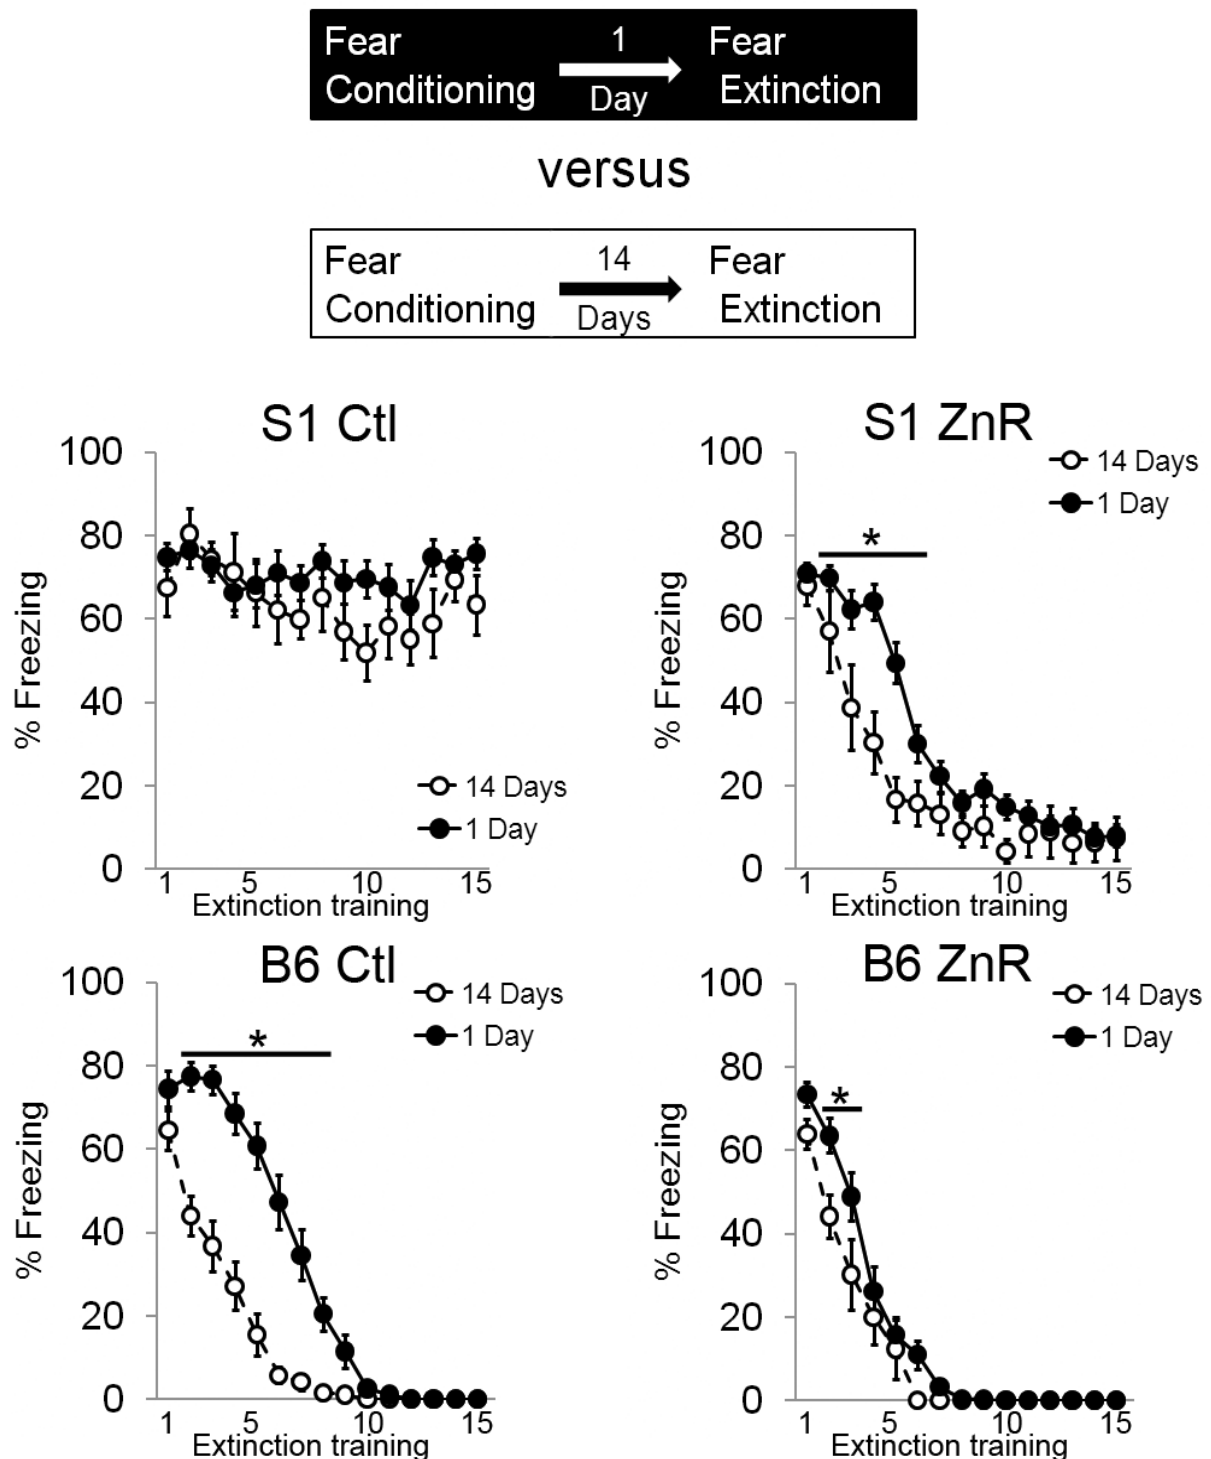

Supplement: NIHMS312823-supplement-Supplementary_Data.pdf [file NIHMS312823-supplement-Supplementary_Data.pdf]
